## **Palmitvaccenic acid ( $\Delta^{11}$ -cis-hexadecenoic acid) is synthesized by an OLE1-like desaturase in the arbuscular mycorrhiza fungus *Rhizophagus irregularis***

Mathias Brands<sup>1</sup>, Edgar B. Cahoon<sup>2</sup> and Peter Dörmann<sup>1</sup>

<sup>1</sup>University of Bonn, Institute of Molecular Physiology and Biotechnology of Plants (IMBIO), Karlrobert-Kreiten-Straße 13, 53115 Bonn, Germany

<sup>2</sup>University of Nebraska, Center for Plant Science Information, E318 Beadle Center, 1901 Vine St., Lincoln NE 68588, USA

**Correspondence:** Peter Dörmann (doermann@uni-bonn.de), phone: 049 228 732830

**Key words:** *Rhizophagus irregularis*, arbuscular mycorrhiza fungi, colonization, biomarker, desaturase, palmitvaccenic acid

**Running title:** Palmitvaccenic acid synthesis in arbuscular mycorrhiza fungi

### **Abstract**

Arbuscular mycorrhiza (AM) fungi deliver mineral nutrients to the plant host in exchange for reduced carbon in the form of sugars and lipids. Colonization with AM fungi upregulates a specific host lipid synthesis pathway resulting in the production of fatty acids. The fungus *Rhizophagus irregularis* accumulates predominantly palmitic acid (16:0) and the unusual palmitvaccenic acid (16:1 <sup>$\Delta^{11}$ cis</sup>). Here, we present the isolation and characterization of *RiOLE1-LIKE*, the desaturase involved in palmitvaccenic acid synthesis, by heterologous expression in yeast and plants. Results are in line with the scenario that *RiOLE1-LIKE* encodes an acyl-CoA desaturase with substrate specificity for C15-C18 acyl groups, in particular C16. Phylogenetic analysis of *RiOLE1-LIKE* related sequences revealed that this gene is conserved in AM fungi from the Glomales and Diversisporales, but is absent from non-symbiotic Mortierellaceae and Mucoromycotina fungi, suggesting that 16:1 <sup>$\Delta^{11}$ cis</sup> provides a specific function during AM colonization.

## Introduction

Mycorrhiza fungi establish symbiotic interactions with plant roots. The fungi provide mineral nutrients, particularly phosphate, to the host, in exchange for reduced carbon [1]. AM fungi establish an intricate membrane system in the cytosol of the root cortex cell, the so-called arbuscule, where nutrient and carbon exchange takes place [2]. Previously, it was believed that carbon is transported to the fungus solely in the form of carbohydrates. The fact that AM fungi lack the genes for fatty acid *de novo* synthesis, together with recent evidence that plant-derived fatty acids accumulate in the fungus, demonstrated that in addition to carbohydrates, fatty acid-containing lipids are transferred from the plant to the fungus [3–6]. In line with this scenario, expression of host specific genes (e.g. *DIS*, *FatM*, *RAM2*) involved in fatty acid and lipid synthesis is upregulated during colonization. The *DIS* gene encodes plastidial  $\beta$ -keotacyl-acyl carrierer (ACP) synthase I (KASI) involved in the production of palmitoyl-(16:0)-ACP [6]. *FatM* encodes a plastidial acyl-ACP thioesterase, with high activity for hydrolysis of 16:0-ACP [7,8]. After export from the plastids, fatty acids are converted into acyl-CoA thioesters. The *RAM2* gene product produces sn2-acyl-glycerol form glycerol-3-phosphate and acyl-CoA, with preference for 16:0-CoA [3]. Recently, methyl-myristic acid (methyl-14:0) was shown to induce spore formation of *R. irregularis* [9]. Furthermore, myristic acid (14:0) supplementation to the medium was sufficient to support hyphal growth in axenic culture, 14:0 was taken up by the fungus and metabolized [10]. Taken together, these results suggest that a 14:0 or 16:0-containing lipid most likely is transferred from the host to the fungus where it serves as carbon source in addition to carbohydrates.

While AM fungi genomes lack the genes of fatty acid *de novo* synthesis, they do contain genes encoding fatty acid desaturases and elongases [4]. Therefore, AM fungi can desaturate and produce very long chain fatty acids from precursors such as 14:0 or 16:0 [11]. The major fatty acids in AMF are 16:0 and 16:1 $^{\Delta 11cis}$  (11-cis-palmitvaccenic acid; 16:1 $^{\omega 5cis}$ ). 16:1 $^{\Delta 11cis}$  is absent from plants. It accounts for 46 - 78 mol% of total fatty acids in spores of AMF of the Glomales including the families Acaulosporaceae, Glomaceae and Gigasporaceae, albeit some species of Glomaceae (*Glomus leptotichum*, *Glomus occultum*) and Gigasporaceae (*Gigaspora albida*, *Gigaspora gigantea*, *Gigaspora margarita*, *Gigaspora rosea*) contain no or traces of 16:1 $^{\Delta 11cis}$ . In addition to 16:1 $^{\Delta 11cis}$ , *Rhizophagus irregularis*, *Glomus claroideum* and *Gigaspora roseae* spores and hyphae contain 0.2 - 3.3 mol% of 16:1 $^{\Delta 9cis}$  (palmitoleic acid; 16:1 $^{\omega 7cis}$ ). Glomaceae species lacking 16:1 $^{\Delta 11cis}$  (*Glomus leptotichum*, *Glomus occultum*) instead contain considerable amounts (11 - 55 %) of 16:1 $^{\Delta 9cis}$ . Spores of *Gigaspora* spp. with low amounts of 16:1 $^{\Delta 11cis}$  contain high contents (38 - 48 %) of 18:1 $^{\Delta 9cis}$  (oleic acid) and 8 - 15 % of 20:1 $^{\Delta 11cis}$  (gondoic acid) [12]. Oleic acid and gondoic acid are present in low amounts in spores of *R. irregularis* and other Glomaceae [11,12].

Palmitoleic acid, oleic acid, and gondoic acid are not AM fungi-specific, because they are found in non-colonized plant roots [11,13]. AM fungi additionally contain C20, C22 and C24 fatty acids. Of these, 20:3 is the predominant one with 0.2 - 1.5 mol% in *R. irregularis* [11,13].

16:1<sup>Δ11cis</sup> is only found in AM fungi but is absent from plants and from most other fungi except for low amounts in the ectomycorrhiza fungi *Pisolithus tinctorius* and *Laccaria bicolor* [14,15]. 16:1<sup>Δ11cis</sup> is also found in some bacterial species, including *Cytophaga hutchinsonii* or *Lactobacillus* spp. [16,17]. In some moths, 16:1<sup>Δ11cis</sup> serves as intermediate for the synthesis of sex pheromones. In *Trichoplusia ni*, 16:1<sup>Δ11cis</sup> is chain-shortened to 14:1<sup>Δ9cis</sup> and 12:1<sup>Δ7cis</sup>, the latter being reduced to the alcohol and acetylated, forming the active pheromone cis-7-dodocenylyl acetate [18]. In the small ermine moths *Yponomeuta evonymella* and *Y. padella*, 11-cis-hexadecenol-acetate is directly used as sex pheromone [19].

In AM fungi, 16:1<sup>Δ11cis</sup> accumulates in different glycerolipids, mostly in the storage lipid triacylglycerol, but it is also found in phospholipids [4,13]. Because of the rather unique presence in AM fungi, 16:1<sup>Δ11cis</sup> and of other specific fatty acids (e.g. 20:3), these fatty acids were used as lipid biomarkers for AM fungi under laboratory and field conditions [12,20,21]. In line with this scenario, the rate of colonization with *R. irregularis* correlates with the accumulation of 16:1<sup>Δ11cis</sup> in colonized roots [22–24].

The gene involved in 16:1<sup>Δ11cis</sup> production in AM fungi remained unknown. Evaluation of the *R. irregularis* genome and transcriptome revealed the presence of one sequence (*RiOLE1*) with high similarity to the *Saccharomyces cerevisiae* *OLE1* (oleic acid dependent1) gene, and a second sequence (*RiOLE1-LIKE*) with lower similarity [4]. In addition, the *R. irregularis* genome contains five sequences with high similarity to the Δ12 desaturase, Δ5 desaturase and Δ6 desaturase sequences from *Mortierella alpina* [4]. To identify the gene involved in 16:1<sup>Δ11cis</sup> production in *R. irregularis*, we focused on the characterization of *RiOLE1* and *RiOLE1-LIKE*. Expression in the *S. cerevisiae* Δ*ole1* mutant together with fatty acid analysis and fatty acid feeding experiments revealed that *RiOLE1* predominantly produces oleic acid (18:1<sup>Δ9cis</sup>), while *RiOLE1-LIKE* is crucial for the synthesis of 16:1<sup>Δ11cis</sup>. *RiOLE1-LIKE* was subsequently introduced into transgenic tobacco and Camelina, to evaluate its capacity to produce 16:1<sup>Δ11cis</sup> in a plant system, and the phylogenetic distribution of *RiOLE1-LIKE* in symbiotic and non-symbiotic fungi was investigated.

## Experimental

### Phylogenetic analysis

For retrieving the desaturase sequences from *R. irregularis*, the four characterized *Mortierella alpina* desaturase sequences were retrieved from UniProtKB (uniprot.org) and used in BLASTp searches at the EnsemblFungi database (fungi.ensembl.org). For phylogenetic analysis of desaturases in symbiotic and non-symbiotic Mucoromycota, *RiOLE1* and *RiOLE1-LIKE* sequences were used in BLASTn searches to identify orthologs in *Gigaspora rosea*, *Rhizophagus cerebriforme* and *Rhizophagus diaphanus* genomes available at MycoCosm [25]. *Rhizophagus clarus*, *Mortierella circinelloides*, *Rhizophagus microsporus*, *Mortierella elongata* and *Lobosporangium transversale* genomes at EnsemblFungi were surveyed for *RiOLE1* and *RiOLE1-LIKE* orthologs using BLASTp. The sequences for phylogenetic analyses were aligned using MUSCLE implemented in MEGA 7, and the alignments used to create a maximum-likelihood tree with the WAG +F nucleotide substitution model. Gamma distributed rates with invariant sites (G+I) and 1000 bootstrap iterations were performed [26].

### Expression of *RiOLE1* and *RiOLE1-like* in yeast

The cDNAs of *RiOLE1* and *RiOLE1-LIKE* were amplified from *R. irregularis* RNA isolated from colonized *Lotus japonicus* roots by RT-PCR (for oligonucleotides, see Supplementary Table S1). The cDNAs were ligated into the expression vector pDR196 using the restriction enzymes *SmaI* and *XhoI* [27]. The constructs were transferred into *Saccharomyces cerevisiae* BY4741 (wild type, WT) and the  $\Delta ole1$  mutant (accession Y40963) obtained from EUROSCARF, and transformed cells selected on minimal medium lacking uracil. The growth of  $\Delta ole1$  was supported by addition of 1 mM oleic acid.

For complementation experiments, single colonies of  $\Delta ole1$  cells containing different constructs were used to inoculate 20 mL cultures of minimal medium with or without 1 mM oleic acid/1% (v/v) Triton-X 100, and cells were grown at 33°C. Alternatively, the cells were spotted in a serial dilution on solid medium and grown at 28°C for five days.

Fatty acid feeding experiments were performed with whole *S. cerevisiae* cells. To this end, minimal medium lacking uracil was inoculated with single colonies from plates. Cells were supplemented with 1% (v/v) Triton X-100 and 1 mM of 15:0 or  $^{13}\text{C}_4$ -16:0 fatty acid, and grown for 2 days at 28°C.

### Expression of *RiOLE1* and *RiOLE1-like* in plants

The cDNAs for *RiOLE1* and *RiOLE1-LIKE* were amplified by PCR for expression in *Nicotiana benthamiana* (for oligonucleotides, see Supplementary Table S1). *RiOLE1* was cloned into

the vector p917RFPUBQExpr (Nicole Gaude, MPI Potsdam-Golm) using *Bam*HI, *Hind*III, and *RiOLE1-LIKE* was ligated into the vector pBin35S-DsRed using *Mlu*I, *Xho*I [28]. The constructs were transferred into *Agrobacterium tumefaciens* GV3101-pMP90 and used for transient transformation of *N. benthamiana* leaves [29]. Plants with infiltrated leaves were grown at 25°C, 60% humidity and light intensity of 250 mmol s<sup>-1</sup> m<sup>-2</sup> for 4 to 11 days and expression of the *DsRed* marker was evaluated with a fluorescent lamp (NightSea, Bedford, USA).

For expression in *Camelina sativa*, *RiOLE1* and *RiOLE1-LIKE* cDNAs were amplified by PCR (for oligonucleotides, see Supplementary Table S1) and cloned into pBinGlyBar1 (Edgar Cahoon, University of Nebraska-Lincoln) using *Eco*RI, *Xho*I and transferred into *A. tumefaciens* GV3101. *Camelina sativa* accession CAM139 (ACCID 243618; IPK Gatersleben, Germany) [30], and a high-palmitate line expressing *CpuFatB1* [31] were transformed via vacuum infiltration [32]. T1 plants were germinated and screened by spraying the plants at 5 and 12 days post germination with 0.3 % (v/v) BASTA (Bayer CropScience) containing 500 µL L<sup>-1</sup> Silwet L-77. Seeds from resistant plants were harvested for single-seed fatty acid analysis.

### **Lipid extraction and fatty acid analysis**

Lipids were extracted from yeast cultures and *N. benthamiana* leaves. Yeast cultures were centrifuged at 4000 g for 10 min and the pellet resuspended in 4 mL water and boiled for 5 min. Lipids were extracted with three volumes of chloroform/methanol (2:1, v/v) after centrifugation at 5 min for 2000 g and re-extracted two times with two volumes of chloroform each. Transformed *N. benthamiana* leaf areas were dissected and frozen in liquid nitrogen. Leaves were homogenized in a mortar under liquid nitrogen and the leaf powder was used for lipid extraction with chloroform/methanol/formic acid (1:1:0.1, v/v) and 1 M KCl/0.2 M H<sub>3</sub>PO<sub>4</sub>. The solvent of the lipid extracts were evaporated under N<sub>2</sub> gas and the lipids separated by solid-phase extraction or directly used for synthesis of fatty acid methyl esters.

For solid phase extraction, lipids were dissolved in 1 mL chloroform and loaded onto silica columns (1 mL bed volume; Phenomenex, Torrance, CA, USA). Non polar lipids were eluted with chloroform, galactolipids with acetone/isopropanol 1:1 (v/v) and phospholipids with methanol. The solvents were evaporated with N<sub>2</sub> gas.

Fatty acid methyl esters were synthesized from dried total lipid extracts, solid phase extraction-fractions, or single seeds of *Camelina* by incubation with 1 N methanolic HCl at 80°C for 30 min [33]. Methyl esters were extracted with n-hexane and 0.9% (w/v) NaCl. *Camelina* seeds were homogenized prior to incubation with methanolic HCl. Fatty acid methyl esters from *R. irregularis*-colonized *L. japonicus* roots or *R. irregularis* extraradical mycelium (ERM) were prepared as previously described [7]. Fatty acid methyl esters were

analyzed by gas chromatography with flame ionization detector (Agilent 7890A Plus GC; Agilent, Santa Clara, CA, USA) [4] or by gas chromatography-mass spectrometry (6975C inertXL MSD with Triple-Axis Detector with 7890A GC, Agilent) with an HP 5-MS column (Agilent J&W, 30 m, 0.25 mm diameter, 0.25  $\mu$ m film). Pentadecanoic acid (15:0) was used as internal standard.

The double bond positions were investigated after conversion of monounsaturated fatty acid methyl esters with dimethyldisulfide (DMDS) into bis(methylthio)-derivatives [34]. Dimethyldisulfide derivatives were analyzed by GC-MS.

### Measurement of acyl-CoAs

Acyl-CoAs were extracted from homogenized leaf material of *N. benthamiana* (20 mg) as described [35,36]. For measurement in yeast, the cell pellet of a 2 mL culture was resuspended in 200  $\mu$ L of the extraction buffer (1 mL isopropanol, 1 mL 50 mM  $\text{KH}_2\text{PO}_4$ , pH 7.2, 25  $\mu$ L acetic acid, 40  $\mu$ L 50 mg  $\text{mL}^{-1}$  fatty acid free bovine serum albumine) and homogenized in the Precellys homogenizer with glass beads. Extracted acyl-CoAs were dissolved in solvent B ( $\text{H}_2\text{O}$ /acetonitrile; 90:10; v/v; containing 15 mM  $\text{NH}_4\text{OH}$ ) and separated on an RP8 column (Knauer Eurospher II, 150 mm, 3 mm) at a flow rate of 0.5  $\text{mL min}^{-1}$  with the following gradient: 0 min, 100% solvent B; 5 min, 25% solvent A (acetonitrile containing 15 mM  $\text{NH}_4\text{OH}$ )/75% solvent B; 11-13 min, 100 % solvent A; 15-18 min, 100% solvent C ( $\text{H}_2\text{O}$ /acetonitrile/formic acid, 30:70:0.1, v/v); 20-30 min, 100% solvent B. Eluted acyl-CoAs were quantified by MS/MS with electrospray ionization on an Agilent 6530 Q-TOF mass spectrometer. Acyl-CoAs were ionized in the positive mode and quantified using the neutral loss of 506.9960 (characteristic for adenosine-3'-phosphate-5'-diphosphate) using 17:0-CoA as internal standard.

## Results

### ***R. irregularis* contains two genes with sequence similarity to the *S. cerevisiae* acyl-CoA desaturase OLE1**

The genome of *R. irregularis* harbors seven open reading frames with sequence similarity to desaturases from *Mortierella alpina* and *Saccharomyces cerevisiae*. These genes can be divided into three clades based on amino acid sequence relationship (Figure Supplementary S1). Clade I contains sequences from *M. alpina* with specificity for  $\Delta 5$  and  $\Delta 6$  desaturation [37] and three *R. irregularis* genes. Clade II contains one *R. irregularis* sequence and two *M. alpina* desaturases specific for  $\Delta 12$  and  $\omega 3$ . The *M. alpina* and *S. cerevisiae* OLE1  $\Delta 9$

desaturases belong to Clade III and show highest similarity with *R. irregularis* RIR 1928200 (designated *RiOLE1*), and the second most similar sequence is RIR 2584800 (*RiOLE1-LIKE*).

Expression of the two genes was recorded in *Daucus carota* roots growing in tissue culture which were infected with *R. irregularis* (+ myc, intraradical mycelium, IRM) and extraradical mycelium (ERM). Semiquantitative RT-PCR with total RNA revealed that expression of *RiOLE1* and *RiOLE1-LIKE* is similar in IRM and ERM, even though *RiOLE1-LIKE* shows stronger overall expression (Supplementary Figure S2A). Therefore, expression of *RiOLE1* or *RiOLE1-LIKE* is not upregulated in the fungus during AM colonization, but the two genes are constitutively expressed.

To study the biochemical function of *R. irregularis RiOLE1* and *RiOLE1-LIKE*, the two cDNAs were transferred into the fatty acid-auxotroph yeast  $\Delta ole1$  mutant. This yeast mutant is deficient in the 18:0-CoA  $\Delta 9$  desaturase and therefore can only grow after supplementation of unsaturated fatty acids such as oleic acid (18:1 $\Delta 9cis$ ) to the medium. Introduction of *RiOLE1* or *RiOLE1-LIKE* both resulted in complementation of the growth deficiency of  $\Delta ole1$  (Figure 1A, B). The yeast  $\Delta ole1$  mutant was used to examine the fatty acid desaturation products after heterologous expression of *RiOLE1* and *RiOLE1-LIKE* by GC (Figure 1C). Expression of *RiOLE1-LIKE* led to the accumulation of the mycorrhiza signature fatty acids, 11-cis-palmitavaccenic acid (16:1 $\Delta 11cis$ ) and vaccenic acid (18:1 $\Delta 11cis$ ) (Figure 1C, Supplementary Figure S2A). On the other hand, expression of *RiOLE1* resulted in a strong increase in oleic acid (18:1 $\Delta 9cis$ ) content. Expression of the two desaturases in  $\Delta ole1$  led to a slight decrease in palmitoleic acid (16:1 $\Delta 9cis$ ), and *RiOLE1* expression slightly affected the myristic acid (14:0) content. However, no desaturation product of 14:0 (14:1) was detected in any yeast strain.

*RiOLE1* and *RiOLE1-LIKE* gene expression in the different yeast cultures was determined by semiquantitative RT-PCR (Figure 1D). *RiOLE1* and *RiOLE1-LIKE* were expressed to the same extents in the recombinant yeast cultures, indicating that the differences in fatty acid desaturation are due to different activities or substrate preferences of the enzymes.

### **Determination of double bond position of mycorrhiza-signature fatty acids**

The double bond position of unsaturated fatty acids can be determined after covalent modification of double bonds with dimethyldisulfide followed by GC-MS analysis, giving rise to peaks with specific retention times and fragmentation patterns. Therefore, total lipids isolated from the different yeast  $\Delta ole1$  strains were converted into methyl esters and derivatized with dimethyldisulfide (Figure 2). Four monounsaturated fatty acids were present in the total fatty acid extracts (Supplementary Figure S3). Their fragmentation patterns allowed

the identification of the double bonds at  $\Delta 9$  of palmitoleic acid ( $16:1^{\Delta 9\text{cis}}$ ) and oleic acid ( $18:1^{\Delta 9\text{cis}}$ ) (Figure 2A, 2C) and  $\Delta 11$  for palmitvaccenic acid ( $16:1^{\Delta 11\text{cis}}$ ) and vaccenic acid ( $18:1^{\Delta 11\text{cis}}$ ) (Figure 2B, 2D). While palmitoleic acid and oleic acid accumulated in *RiOLE1* expressing cells, palmitvaccenic acid and vaccenic acid were abundant in *RiOLE1-LIKE* cells (Supplementary Figure S3).

### Heterologous expression of *RiOLE1* and *RiOLE1-LIKE* in transgenic plants

To characterize the two *R. irregularis* desaturases in a non-fungal background, *Agrobacterium* harboring vectors with the *RiOLE1* and *RiOLE1-LIKE* cDNAs were infiltrated into *Nicotiana benthamiana* leaves for transient expression (Supplementary Figure S4). Expression of *RiOLE1* resulted in an increase in oleic acid in non polar lipids, galactolipids and phospholipids, accompanied by increased 18:2 content in non polar lipids and phospholipids (Supplementary Figure S4A). *RiOLE1-LIKE* expression in *N. benthamiana* leaves led to the accumulation of  $16:1^{\Delta 11\text{cis}}$ , particularly in neutral lipids and phospholipids but not galactolipids (Supplementary Figure S4B). These results are in agreement with the data obtained from heterologous expression in yeast and demonstrate that *RiOLE1* and *RiOLE1-LIKE* encode a  $\Delta 9$  and  $\Delta 11$  desaturase, respectively.

It is known that unusual fatty acids such as  $16:1^{\Delta 11\text{cis}}$  are excluded from plant membrane lipids, but they can accumulate in the seed oils of many plants [38]. We therefore expressed *RiOLE1-LIKE* using a seed-specific promoter in Camelina to study the fatty acid composition of the oil in mature seeds. Fatty acid measurement showed that  $16:1^{\Delta 11\text{cis}}$  accumulated to 0.03 - 0.08 mol% in single transgenic *RiOLE1-LIKE* expressing Camelina seeds (Supplementary Table S2), while it was undetectable in WT seeds. In addition, the content of  $20:1^{\Delta 11}$  increased from 12.7 mol% to 17.5 - 20.5 mol% when *RiOLE1-LIKE* was expressed. The very low amount of  $16:1^{\Delta 11\text{cis}}$  in transgenic Camelina seeds might be due to the low availability of the substrate, 16:0, because Camelina seeds mostly accumulate C18 fatty acids. We therefore introduced the *RiOLE1-LIKE* construct into a high 16:0-containing Camelina line [31]. This line carries an overexpression construct for the acyl-ACP thioesterase CpuFatB1 from *Cuphea pulcherrima* resulting in the termination of fatty acid synthesis at C16, and in the accumulation of 16:0 in the seed oil from ~11 % to ~42 % (Supplementary Table S2). Expression of *RiOLE1-LIKE* in transgenic CpuFatB1 seeds resulted in the increase in palmitvaccenic acid content to 0.24 - 0.82 mol% (Supplementary Table S2). Likewise, the content of  $20:1^{\Delta 11}$  was slightly increased, albeit total amounts were lower compared with CAM139 transformed seeds. Taken together, *RiOLE1-LIKE* expression in the seeds of Camelina resulted in the accumulation of  $16:1^{\Delta 11\text{cis}}$ , albeit with low amounts, and the amount was increased but still < 1 mol% in a high palmitic acid Camelina line.



### Addition of exogenous fatty acids to yeast

To examine fatty acid substrate specificity of *RiOLE1* and *RiOLE1-LIKE* in more detail, fatty acids were added to growing yeast cultures. We first added a stable isotope labeled 16:0 fatty acid ( $^{13}\text{C}_4$ -16:0) to follow the incorporation of label into the different desaturation and elongation products. When  $^{13}\text{C}_4$ -16:0 was supplied to the yeast cells, the  $^{13}\text{C}_4$ -label accumulated in all fatty acids in WT, but was strongly reduced in 16:1 $^{\Delta 9\text{cis}}$  and 18:1 $^{\Delta 9\text{cis}}$  in the  $\Delta ole1$  mutant where 18:0 accumulated instead (Figure 3A). Upon expression of *RiOLE1* and *RiOLE1-LIKE* in  $\Delta ole1$ ,  $^{13}\text{C}_4$ -label accumulation in 16:1 $^{\Delta 9\text{cis}}$  was even further decreased. In addition, oleic acid became abundantly labeled when *RiOLE1* was expressed in  $\Delta ole1$ , while expression of *RiOLE1-LIKE* in  $\Delta ole1$  led to the most abundant accumulation of  $^{13}\text{C}_4$ -label in 16:1 $^{\Delta 11\text{cis}}$  (54.44 mol%) and none in 18:1 $^{\Delta 9\text{cis}}$ .

Next, we added the odd-chain fatty acid pentadecanoic acid (15:0) to  $\Delta ole1$  cells expressing *RiOLE1* or *RiOLE-LIKE*. 15:0 was taken up by the cells and elongated to margaric acid (17:0), and both 15:0 and 17:0 were desaturated to 15:1 $^{9\text{cis}}$  and 17:1 $^{9\text{cis}}$ , respectively, in  $\Delta ole1$  cells expressing *RiOLE1* (Figure 3B). When *RiOLE1-LIKE* was expressed in  $\Delta ole1$ , 15:0 and 17:0 were converted into two new peaks which were tentatively identified as 15:1 $^{\Delta 11\text{cis}}$  and 17:1 $^{\Delta 11\text{cis}}$  based on their retention time.

### Acyl-CoA composition in yeast cells and plants expressing *R. irregularis* desaturases

Acyl-CoAs are important intermediates of fatty acid metabolism, and they are the substrate for the OLE1 desaturase from *S. cerevisiae*. Acyl-CoAs were quantified in yeast cells and *N. benthamiana* leaves expressing *RiOLE1* or *RiOLE1-LIKE* (Figure 4) by LC-MS/MS. In this method, acyl-CoAs containing different numbers of carbon atoms or double bonds in the acyl chain can be separated and quantified using an internal standard. However, it is not possible to separate isomeric monounsaturated acyl-CoAs containing the double bond at different positions. In yeast  $\Delta ole1$ , 16:1-CoA and 18:1-CoA decreased while 16:0-CoA, 18:0-CoA and 20:0-CoA accumulated, compared to WT (Figure 4A). Expression of *RiOLE1-LIKE* in  $\Delta ole1$  led to a very strong increase in 16:1-CoA (43.6 mol%) and to a lesser increase in 18:1-CoA (7.6 mol%) while the amount of 20:0-CoA (2.9 mol%) was decreased. On the other hand, 18:1-CoA increased most predominantly when *RiOLE1* was expressed (26.7 mol%).

Expression of *RiOLE1-LIKE* in *N. benthamiana* leaves led to the accumulation of 16:1-CoA (16.8 mol%) accompanied with a decrease in 16:0-CoA (41.1 mol%) that was not detected in control leaves (Figure 4B). Expression of *RiOLE1* led to the increase in 18:1-CoA to 5.2 mol%, which remained low in the control (1.3 mol%) and *RiOLE1-LIKE* (2.2 mol%). Taken together, these results are in agreement with a substrate/product relationship of 18:0-CoA/18:1-CoA and 16:0-CoA/16:1-CoA for *RiOLE1* and *RiOLE1-LIKE*, respectively, suggesting that *RiOLE1* and *RiOLE-LIKE* are acyl-CoA desaturases.

## **The *OLE1-LIKE* genes are conserved in AM Glomeromycotina, but not in non-symbiotic Mucoromycota**

AM fungi of the Glomeromycotina likely evolved from saprotrophic Mucoromycota [39]. To study the evolution of *RiOLE1* and *RiOLE1-LIKE* sequences and their distribution in the different fungal phyla, the two desaturase sequences from *R. irregularis* were used to identify orthologs in other Glomeromycotina as well as non-mycorrhizal Mucoromycota using protein Blast searches. Protein sequences of several fungal species were retrieved and used to assemble a phylogenetic tree (Figure 5). Two major clades were identified, one clade that comprises sequences similar to *RiOLE1-LIKE* that were present in all five representatives of the Glomeromycotina. These sequences were more similar to each other than to the sequences organized in the second clade representing the sequences highly similar to *RiOLE1*. Sequences similar to *RiOLE1* were found in all six Glomeromycotina species and in the non-symbiotic Mortierellaceae (*M. alpina*, *M. elongata*, *L. transversale*) as well as in the non-symbiotic Mucoromycotina (*M. circinelloides*, *R. microsporus*). Thus, *OLE1-LIKE* is conserved in symbiotic Glomales and Diversisporales, but not in non-symbiotic fungi, suggesting that it evolved to fulfill a specific function in AM fungi.

## **Discussion**

### ***RiOLE1* and *RiOLE1-LIKE* are front-end desaturases**

Desaturases are classified based on their ability to either recognize the methyl ( $\omega$ ) or carboxyl ( $\Delta$ ) end of fatty acids for insertion of the double bond [40]. The double bond position of fatty acids can be identified after derivatization with dimethyldisulfide. Thus, four monounsaturated fatty acids were detected in  $\Delta ole1$  cells expressing *RiOLE1-LIKE*, i.e.  $16:1^{\Delta 9cis}$ ,  $16:1^{\Delta 11cis}$ ,  $18:1^{\Delta 9cis}$ ,  $18:1^{\Delta 11cis}$  (Figure 2, Supplementary Figure S3). The fatty acids  $16:1^{\Delta 9cis}$  and  $18:1^{\Delta 9cis}$  are also present in the  $\Delta ole1$  control and are therefore derived from residual activity of *ScOLE1* rather than from *RiOLE1-LIKE*.  $16:1^{\Delta 11cis}$  could in principle be derived from front end ( $\Delta 11$ ) or methyl end ( $\omega 5$ ) desaturation. However,  $18:1^{\Delta 11cis}$  must be derived from  $\Delta 11$  desaturation. This fatty acid cannot be the product of  $16:1^{\Delta 11cis}$  elongation by addition of two carbons at the carboxyl end, which would have resulted in  $18:1^{\Delta 13cis}$  production. Similarly,  $\omega 5$  desaturation of  $18:0$  by *RiOLE1-LIKE* would also have resulted in

the production of 18:1<sup>Δ13cis</sup>. Likewise, upon *RiOLE1* expression in  $\Delta ole1$ , only 16:1<sup>Δ9cis</sup> and 18:1<sup>Δ9cis</sup> were produced. While 18:1<sup>Δ9cis</sup> could in principle be produced via Δ9 or ω9 desaturation, 16:1<sup>Δ9cis</sup> is clearly derived from Δ9 desaturation of 16:0, because ω9 desaturation would result in 16:1<sup>Δ7cis</sup> production, and elongation of a putative 14:1<sup>Δ7cis</sup> precursor is not likely as it was not detected.

These conclusions are corroborated by the fatty acid analysis of yeast  $\Delta ole1$  cultures after 15:0 feeding (Figure 3). In this experiment, 15:1<sup>Δ9</sup> and 17:1<sup>Δ9</sup> were strongly increased after expression of *RiOLE1* compared with the control. Expression of *RiOLE1*-LIKE in  $\Delta ole1$  cells resulted in the accumulation of 15:1<sup>Δ11</sup> and 17:1<sup>Δ11</sup> from 15:0. Taken together, these data demonstrate that *RiOLE1* and *RiOLE1*-LIKE are front-end desaturases that count carbon atoms from the carboxyl-terminus for insertion of the double bond at positions Δ9 or Δ11, respectively.

### ***RiOLE1* and *RiOLE1*-LIKE likely are acyl-CoA desaturases with specificities for long chain fatty acids**

*RiOLE1* and *RiOLE1*-LIKE show sequence similarity with the yeast acyl-CoA desaturase OLE1 (Supplementary Figure S1) and can functionally replace OLE1 in the  $\Delta ole1$  mutant, strongly promoting growth in the absence of exogenous unsaturated fatty acids (Figure 1). In similar approaches, desaturases from rat or *Rhodospiridium* with sequence similarity to OLE1 were characterized [41,42]. Expression of *RiOLE1* and *RiOLE1*-LIKE leads to alteration in acyl-CoA composition in yeast and plants with a clear substrate to product relationship (Figure 4). While *RiOLE1* expression resulted in an increase in 18:1-CoA and a decrease in 18:0-CoA, expression of *RiOLE1*-LIKE caused an increase in 16:1-CoA and a reduction in 16:0-CoA, both compared with  $\Delta ole1$ . Therefore, *RiOLE1* and *RiOLE1*-LIKE likely are acyl-CoA desaturases.

Expression of *RiOLE1* in plants (*N. benthamiana* leaves, Camelina seeds) led to a very low production of 16:1<sup>Δ11cis</sup>. (Supplementary Table S1, Supplementary Figure S4). In plants, most desaturation reactions take place on lipid-bound acyl groups, i.e phosphatidylcholine at the ER, before acyl groups are redistributed to other membrane lipids in the leaves or to triacylglycerol in the seeds. Introduction of heterologous acyl-CoA desaturases into plants oftentimes results in low production of the new unsaturated fatty acid because it has to be channeled between the phosphatidylcholine and CoA thioester pools, and this redistribution is slow [43].

Furthermore, addition of exogenous 15:0 resulted in the accumulation of the respective desaturation products (15:1<sup>Δ11cis</sup>, 17:1<sup>Δ11cis</sup> for *RiOLE1*-LIKE; 15:1<sup>Δ9cis</sup>, 17:1<sup>Δ9cis</sup> for *RiOLE1*; Figure 3B) indicating that the two enzymes are to a certain degree promiscuous in their substrate specificity and accept a range of long-chain (C15-C18) fatty acids.

Feeding of  $^{13}\text{C}_4$ -labeled 16:0 revealed the accumulation of the  $^{13}\text{C}_4$ -label in all endogenous yeast fatty acids (Figure 4A). Yeast OLE1 is able to desaturate 16:0 and 18:0 [41]. When  $^{13}\text{C}_4$ -16:0 was offered,  $^{13}\text{C}_4$ -label accumulated in 18:0 (27.0 mol%) in yeast WT. This was sufficient as substrate for ScOLE1 to produce  $^{13}\text{C}_4$ -18:1 $^{\Delta 9\text{cis}}$ , even though this product only accumulated to 7.4 mol%. Using the same conditions, no  $^{13}\text{C}_4$ -label was found in 18:1 $^{\Delta 11\text{cis}}$  in  $\Delta ole1$  expressing *RiOLE1-LIKE*, even though sufficient substrate was available (42.5 mol% of  $^{13}\text{C}_4$ -18:0). Therefore, *RiOLE1-LIKE* has much poorer activity on 18:0 than yeast ScOLE1, and consequently *RiOLE1-LIKE* has a strong preference for the 16:0 substrate (Figure 1C, 2D). 18:0 desaturation in *R. irregularis* is probably foremost conducted by *RiOLE1*, in accordance with the accumulation of  $^{13}\text{C}_4$ -18:1 $^{\Delta 9\text{cis}}$  (34.4 mol%) while only miniature amounts of  $^{13}\text{C}_4$ -16:1 $^{\Delta 9\text{cis}}$  (2.6 mol%) were detected upon *RiOLE1* expression. Functional differentiation of acyl-CoA desaturases was reported before for mice where four desaturases exist, three act on 16:0-CoA and 18:0-CoA and one is specialized for acyl-CoAs with fatty acids < 16:0 [44].

### **OLE1-LIKE evolved in AM fungi**

OLE1-LIKE is conserved in the Glomerales *R. clarus*, *R. irregularis*, *R. diaphanus*, *R. cerebriforme* and in *G. rosea* (Diversisporales) but not in the other non-symbiotic, non-mycorrhizal Mucoromycota (Figure 5). The Mucoromycota species only contain OLE1 orthologs. A characteristic feature of Glomeromycotina are their large genomes with high numbers of duplicated genes, compared to Mortierellamycotina and Mucoromycotina [25]. Therefore, the *OLE1-LIKE* gene could originate from gene duplication of *OLE1* and neofunctionalization in Glomeromycotina and might have evolved to fulfill a specific function during the obligate mutualistic AM symbiosis. The expression pattern of *RiOLE1-LIKE* in IRM and ERM (Supplementary Figure S2A) is consistent with the occurrence of 16:1 $^{\Delta 11\text{cis}}$  in non polar storage lipids and membrane-forming phospholipids in IRM and ERM, even though considerably less 16:1 $^{\Delta 11\text{cis}}$  is found in the IRM [13].

### **Possible functions of 16:1 $^{\Delta 11\text{cis}}$ in AM fungi**

Interestingly, overexpression of the *S. saccharomyces*  $\Delta 9$  desaturase (OLE1) or of an insect  $\Delta 11$  desaturase, which resulted in the accumulation of 16:1 $^{\Delta 9\text{cis}}$  and 16:1 $^{\Delta 11\text{cis}}$  in transgenic *Nicotiana tabacum* leaves, respectively, led to the accumulation of lipoxygenase products, in particular cis-3-hexenal [45]. The same effect was observed when the two fatty acids were exogenously applied to *N. tabacum* leaves. The authors concluded that the presence of unusual monounsaturated C16 fatty acids stimulated the lipoxygenase pathway thereby contributing to enhanced resistance against pathogens. In line with this finding, overexpression of *S. cerevisiae* OLE1 in tomato or in eggplant increased the resistance

against powdery mildew (*Erysiphe polygoni*) and Verticillium wilt (*Verticillium dahliae*) [46,47]. Interestingly, 16:1<sup>Δ9cis</sup> and to a lesser extent 18:1<sup>Δ9cis</sup>, inhibited growth of *Verticillium dahliae* at μM concentrations. Therefore, it is possible that monounsaturated C16 fatty acids, in particular 16:1<sup>Δ11cis</sup>, which accumulates in membrane and storage lipids, protect AM fungal spores and hyphae in the soil against attack by bacteria or other fungi. Furthermore, the unusual 16:1<sup>Δ11cis</sup> fatty acid could be involved in recognition of the AM fungi by the plant host. Membrane lipids of pathogenic fungi are recognized by the plant host as shown by the elicitation of defense responses after application of ergosterol [48,49]. 16:1<sup>Δ11cis</sup> possibly fulfills an opposite function during symbiosis, because it might be perceived by the host as a symbiotic signature to avoid the host's immune response.

On the other hand, certain fatty acid combinations of membrane lipids are elicitors in plant-pathogen interactions, as shown by 18:2, 18:1 and 16:0-containing phosphatidylcholine and phosphatidylethanolamine from female *Sogatella furcifera* eggs [50]. Acyl editing in IRM of *R. irregularis* suggests that 16:1<sup>Δ11cis</sup> could also be perceived by the host as potential pathogenic elicitor as *R. irregularis* alters its phospholipid fatty acid composition and suppresses di-16:1 and 24:1 when growing intracellularly [4]. Therefore, 16:1<sup>Δ11cis</sup> biosynthesis could have been evolved in Glomeromycota for survival in the hostile soil environment during asymbiotic growth and it might be beneficial during host perception and symbiotic growth.

### Abbreviations

ACP, acyl carrier protein; AM, arbuscular mycorrhiza; CoA, coenzyme A; ERM, extraradical mycelium; IRM, intraradical mycelium; WT, wild type.

Fatty acids are abbreviated as X:Y, where X depicts the number of carbon atoms, and Y the number of double bonds in the acyl chain.

### Author Contribution

M.B., E.B.C. and P.D. conceived the project. M.B. and P.D. designed the research. M.B. performed the experiments. M.B. and P.D. analyzed data and wrote the article.

### Funding

This research was supported by the Deutsche Forschungsgemeinschaft (grant Do520/15-1 and Graduiertenkolleg GRK2064) to P.D.

### Competing Interests

The Authors declare that there are no competing interests associated with the manuscript.

## Figure legends

### Figure 1. Complementation of yeast $\Delta ole1$ mutant growth by heterologous expression of *Rhizophagus* desaturases.

*RiOLE1* or *RiOLE1-LIKE* cDNAs were expressed in *S. cerevisiae* WT and the  $\Delta ole1$  mutant cells. Cells were grown in minimal medium with or without supplementation of oleic acid (18:1 <sup>$\Delta^{9cis}$</sup> ). **(A)** Spotting growth assay of yeast cultures. Cells of 10 fold dilutions were pipetted onto solid medium and grown at 28°C for five days. **(B)** Liquid cultures were inoculated from single colonies and grown at 33°C for up to three days, and the OD<sub>600</sub> was recorded. **(C)** Fatty acid composition of yeast WT and  $\Delta ole1$  cells expressing *RiOLE1* or *RiOLE1-LIKE*. Total lipids were extracted from the harvested cells and used for synthesis of fatty acid methyl ester which were quantified by GC. Bars show means  $\pm$  SD. Letters indicate significant differences between treatments (ANOVA; posthoc Tukey;  $p \leq 0.05$ ;  $n=3$ ). **(D)** Expression of *RiOLE1* or *RiOLE1-LIKE* in yeast WT and  $\Delta ole1$ . RNA was isolated from WT or  $\Delta ole1$  cells transformed with empty vector (EV), *RiOLE1* or *RiOLE1-LIKE* constructs. Transcript abundance was measured by RT-PCR with primers for *RiOLE1*, *RiOLE1-LIKE* or *ACTIN*. PCR products were separated on agarose gels and stained with ethidium bromide.

### Figure 2. Determination of double bond position monounsaturated fatty acids isolated from *RiOLE1* or *RiOLE1-LIKE* expressing yeast.

Lipids were isolated from yeast  $\Delta ole1$  mutant cells expressing *RiOLE1-LIKE* and fatty acid converted into methyl esters. Double bonds were derivatized with dimethylsulfide and the products analyzed by GC-MS (for chromatograms, see Supplementary Figure S2). Mass spectra are and structures are shown for **A**, 16:1 <sup>$\Delta^{9cis}$</sup> ; **B**, 16:1 <sup>$\Delta^{11cis}$</sup> ; **C**, 18:1 <sup>$\Delta^{9cis}$</sup> ; **D**, 18:1 <sup>$\Delta^{11cis}$</sup> . F<sub>a</sub>, fragment a; F<sub>b</sub>, fragment b.

### Figure 3. Desaturation of exogenously supplied fatty acids in yeast cells expressing *Rhizophagus* desaturases.

*S. cerevisiae* cells (WT,  $\Delta ole1$ ) expressing *RiOLE1* or *RiOLE1-LIKE* were grown for three days at 28°C in minimal medium supplemented with **(A)** 1 mM <sup>13</sup>C<sub>4</sub>-16:0 or **(B)** 1 mM 15:0. Lipids were extracted from cell pellets and used for fatty acid analysis of methyl esters by GC-MS. **(A)** The amount of overexcess <sup>13</sup>C<sub>4</sub> accumulation (mol%) was quantified in the different fatty acid methyl esters. Letters indicate significant differences among treatments (ANOVA; posthoc Tukey,  $p \leq 0.05$ ,  $n=3$ ). Bars represent means  $\pm$  SD. n.d., not detected; EV, empty vector. **(B)** GC Chromatograms showing methyl esters of yeast lipids after 15:0 feeding.

**Figure 4. Acyl-CoA composition in transformed yeast cells and *N. benthamiana* leaves expressing *Rhizophagus* desaturases.**

Acyl-CoAs were measured by LC-MS/MS. (A) Acyl-CoAs in yeast cells (WT,  $\Delta ole 1$ ) expressing empty vector (EV) control, *RiOLE1* or *RiOLE1-LIKE*. (B) Acyl-CoAs in *N. benthamiana* leaves transiently expressing EV control, *RiOLE1* or *RiOLE1-LIKE*. Letters indicate significant differences among treatments (ANOVA; posthoc Tukey;  $p \leq 0.05$ ). Bars represent means  $\pm$  SD ( $n = 3$ ). *Sc*, *Saccharomyces cerevisiae*; *Nb*, *Nicotiana benthamiana*; n.d., not detected.

**Figure 5. Phylogenetic tree of OLE1 and OLE1-LIKE sequences from Mucoromycota.**

OLE1 and OLE1-LIKE from *R. irregularis* were used to identify orthologs in species of other Glomeromycotina, Mortierellamycotina and Mucoromycotina [25]. Amino acid sequences were aligned using MUSCLE with MEGA 7 and a maximum-likelihood tree constructed with 1000 bootstrap iterations as depicted on the nodes.

## References

- 1 MacLean, A. M., Bravo, A. and Harrison, M. J. (2017) Plant signaling and metabolic pathways enabling arbuscular mycorrhizal symbiosis. *Plant Cell* **29**, 2319–2335  
<https://doi.org/10.1105/tpc.17.00555>
- 2 Luginbuehl, L. H. and Oldroyd, G. E. D. (2017) Understanding the arbuscule at the heart of endomycorrhizal symbioses in plants. *Curr. Biol.* **27**, R952-R963  
<https://doi.org/10.1016/j.cub.2017.06.042>
- 3 Luginbuehl, L. H., Menard, G. N., Kurup, S., van Erp, H., Radhakrishnan, G. V., Breakspear, A., Oldroyd, G. E. D. and Eastmond, P. J. (2017) Fatty acids in arbuscular mycorrhizal fungi are synthesized by the host plant. *Science* **356**, 1175–1178  
<https://doi.org/10.1126/science.aan0081>
- 4 Wewer, V., Brands, M. and Dörmann, P. (2014) Fatty acid synthesis and lipid metabolism in the obligate biotrophic fungus *Rhizophagus irregularis* during mycorrhization of *Lotus japonicus*. *Plant J.* **79**, 398–412 <https://doi.org/10.1111/tpj.12566>
- 5 Jiang, Y., Wang, W., Xie, Q., Liu, N., Liu, L., Wang, D., Zhang, X., Yang, C., Chen, X. and Tang, D. et al. (2017) Plants transfer lipids to sustain colonization by mutualistic mycorrhizal and parasitic fungi. *Science* **356**, 1172–1175 <https://doi.org/10.1126/science.aam9970>
- 6 Keymer, A., Pimprakar, P., Wewer, V., Huber, C., Brands, M., Bucerius, S. L., Delaux, P.-M., Klingl, V., Röpenack-Lahaye, E. v. and Wang, T. L. et al. (2017) Lipid transfer from plants to arbuscular mycorrhiza fungi. *eLife* **6**, e29107 <https://doi.org/10.7554/eLife.29107>
- 7 Brands, M., Wewer, V., Keymer, A., Gutjahr, C. and Dörmann, P. (2018) The *Lotus japonicus* acyl-acyl carrier protein thioesterase FatM is required for mycorrhiza formation and lipid accumulation of *Rhizophagus irregularis*. *Plant J.* **95**, 219–232 <https://doi.org/10.1111/tpj.13943>
- 8 Bravo, A., Brands, M., Wewer, V., Dörmann, P. and Harrison, M. J. (2017) Arbuscular mycorrhiza-specific enzymes FatM and RAM2 fine-tune lipid biosynthesis to promote development of arbuscular mycorrhiza. *New Phytol.* **214**, 1631-1645 <https://doi.org/10.1111/nph.14533>
- 9 Kameoka, H., Tsutsui, I., Saito, K., Kikuchi, Y., Handa, Y., Ezawa, T., Hayashi, H., Kawaguchi, M. and Akiyama, K. (2019) Stimulation of asymbiotic sporulation in arbuscular mycorrhizal fungi by fatty acids. *Nat. Microbiol.* **4**, 1654–1660 <https://doi.org/10.1038/s41564-019-0485-7>
- 10 Sugiura, Y., Akiyama, R., Tanaka, S., Yano, K., Kameoka, H., Kawaguchi, M., Akiyama, K. and Saito, K. (2019) Myristate as a carbon and energy source for the asymbiotic growth of the arbuscular mycorrhizal fungus *Rhizophagus irregularis*. *bioRxiv*, doi:10.1101/731489
- 11 Trepanier, M., Becard, G., Moutoglou, P., Willemot, C., Gagne, S., Avis, T. J. and Rioux, J.-A. (2005) Dependence of arbuscular-mycorrhizal fungi on their plant host for palmitic acid synthesis. *Appl. Environm. Microbiol.* **71**, 5341–5347 <https://doi.org/10.1128/AEM.71.9.5341-5347.2005>
- 12 Graham, J. H., Hodge, N. C. and Morton, J. B. (1995) Fatty acid methyl ester profiles for characterization of glomalean fungi and their endomycorrhizae. *Appl. Environm. Microbiol.* **61**, 58–64
- 13 Olsson, P. A. and Johansen, A. (2000) Lipid and fatty acid composition of hyphae and spores of arbuscular mycorrhizal fungi at different growth stages. *Mycol. Res.* **104**, 429–434  
<https://doi.org/10.1017/S0953756299001410>
- 14 Reich, M., Göbel, C., Kohler, A., Buée, M., Martin, F., Feussner, I. and Polle, A. (2009) Fatty acid metabolism in the ectomycorrhizal fungus *Laccaria bicolor*. *New Phytol.* **182**, 950–964  
<https://doi.org/10.1111/j.1469-8137.2009.02819.x>



- 15 Campos, A. N. d. R., Costa, M. D., Tótola, M. R. and Borges, A. C. (2008) Total lipid and fatty acid accumulation during basidiospore formation in the ectomycorrhizal fungus *Pisolithus* sp. *Rev. Bras. Ciênc. Solo* **32**, 1531–1540 <https://doi.org/10.1590/S0100-06832008000400017>
- 16 Walker, R. W. (1969) Cis-11-hexadecenoic acid from *Cytophaga hutchinsonii* lipids. *Lipids* **4**, 15–18 <https://doi.org/10.1007/BF02531788>
- 17 Hofmann, K. and Tausig, F. (1955) The chemical nature of the fatty acids of a group C *Streptococcus* species. *J. Biol. Chem.* **213**, 415–423
- 18 Bjostad, L. B. and Roelofs, W. L. (1983) Sex pheromone biosynthesis in *Trichoplusia ni*: Key steps involve delta-11 desaturation and chain-shortening. *Science* **220**, 1387–1389 <https://doi.org/10.1126/science.220.4604.1387>
- 19 Ding, B.-J., Hofvander, P., Wang, H.-L., Durrett, T. P., Stymne, S. and Löfstedt, C. (2014) A plant factory for moth pheromone production. *Nat. Commun.* **5**, 3353 <https://doi.org/10.1038/ncomms4353>
- 20 Dalpé, Y., Trépanier, M., Sahraoui, A. L.-H., Fontaine, J. and Sancholle, M. (2012) 8 Lipids of Mycorrhizas. In *Fungal Associations* (Hock, B., ed.), pp. 137–169 [https://doi.org/10.1007/978-3-642-30826-0\\_8](https://doi.org/10.1007/978-3-642-30826-0_8)
- 21 Nordby, H. E., Nemeč, S. and Nagy, S. (1981) Fatty acids and sterols associated with citrus root mycorrhizae. *J. Agricult. Food Chem.* **29**, 396–401 <https://doi.org/10.1021/jf00104a043>
- 22 Olsson, P. A., Bååth, E., Jakobsen, I. and Söderström, B. (1995) The use of phospholipid and neutral lipid fatty acids to estimate biomass of arbuscular mycorrhizal fungi in soil. *Mycol. Res.* **99**, 623–629 [https://doi.org/10.1016/S0953-7562\(09\)80723-5](https://doi.org/10.1016/S0953-7562(09)80723-5)
- 23 Schliemann, W., Ammer, C. and Strack, D. (2008) Metabolite profiling of mycorrhizal roots of *Medicago truncatula*. *Phytochemistry* **69**, 112–146 <https://doi.org/10.1016/j.phytochem.2007.06.032>
- 24 Stumpe, M., Carsjens, J.-G., Stenzel, I., Gobel, C., Lang, I., Pawlowski, K., Hause, B. and Feussner, I. (2005) Lipid metabolism in arbuscular mycorrhizal roots of *Medicago truncatula*. *Phytochemistry* **66**, 781–791 <https://doi.org/10.1016/j.phytochem.2005.01.020>
- 25 Morin, E., Miyauchi, S., San Clemente, H., Chen, E. C. H., Pelin, A., La Providencia, I. de, Ndikumana, S., Beaudet, D., Hainaut, M. and Drula, E. et al. (2019) Comparative genomics of *Rhizophagus irregularis*, *R. cerebriforme*, *R. diaphanus* and *Gigaspora rosea* highlights specific genetic features in Glomeromycotina. *New Phytol.* **222**, 1584–1598 <https://doi.org/10.1111/nph.15687>
- 26 Kumar, S., Stecher, G., Li, M., Niyaz, C. and Tamura, K. (2018) MEGA X: Molecular Evolutionary Genetics Analysis across Computing Platforms. *Mol. Biol. Evol.* **35**, 1547–1549 <https://doi.org/10.1093/molbev/msy096>
- 27 Rentsch, D., Laloi, M., Rouhara, I., Schmelzer, E., Delrot, S. and Frommer, W. B. (1995) NTR1 encodes a high affinity oligopeptide transporter in *Arabidopsis*. *FEBS Lett.* **370**, 264–268 [https://doi.org/10.1016/0014-5793\(95\)00853-2](https://doi.org/10.1016/0014-5793(95)00853-2)
- 28 Patwari, P., Salewski, V., Gutbrod, K., Kreszies, T., Dresen-Scholz, B., Peisker, H., Steiner, U., Meyer, A. J., Schreiber, L. and Dörmann, P. (2019) Surface wax esters contribute to drought tolerance in *Arabidopsis*. *Plant J.*, 1–18 <https://doi.org/10.1111/tbj.14269>
- 29 Wood, C. C., Petrie, J. R., Shrestha, P., Mansour, M. P., Nichols, P. D., Green, A. G. and Singh, S. P. (2009) A leaf-based assay using interchangeable design principles to rapidly assemble multistep recombinant pathways. *Plant Biotechnol. J.* **7**, 914–924 <https://doi.org/10.1111/j.1467-7652.2009.00453.x>
- 30 Marmon, S., Sturtevant, D., Herrfurth, C., Chapman, K., Stymne, S. and Feussner, I. (2017) Two acyltransferases contribute differently to Inolenic acid levels in seed oil. *Plant Physiol.* **173**, 2081–2095 <https://doi.org/10.1104/pp.16.01865>

- 31 Kim, H. J., Silva, J. E., Vu, H. S., Mockaitis, K., Nam, J.-W. and Cahoon, E. B. (2015) Toward production of jet fuel functionality in oilseeds: identification of FatB acyl-acyl carrier protein thioesterases and evaluation of combinatorial expression strategies in *Camelina* seeds. *J. Exp. Bot.* **66**, 4251–4265 <https://doi.org/10.1093/jxb/erv225>
- 32 Lu, C. and Kang, J. (2008) Generation of transgenic plants of a potential oilseed crop *Camelina sativa* by *Agrobacterium*-mediated transformation. *Plant Cell Rep.* **27**, 273–278 <https://doi.org/10.1007/s00299-007-0454-0>
- 33 Browse, J., McCourt, P. J. and Somerville, C. R. (1986) Fatty acid composition of leaf lipids determined after combined digestion and fatty acid methyl ester formation from fresh tissue. *Anal. Biochem.* **152**, 141–145 [https://doi.org/10.1016/0003-2697\(86\)90132-6](https://doi.org/10.1016/0003-2697(86)90132-6)
- 34 Francis, G. W. (1981) Alkylthiolation for the determination of double-bond position in unsaturated fatty acid esters. *Chem. Phys. Lipids* **29**, 369–374 [https://doi.org/10.1016/0009-3084\(81\)90070-0](https://doi.org/10.1016/0009-3084(81)90070-0)
- 35 Larson, T. R. and Graham, I. A. (2001) A novel technique for the sensitive quantification of acyl CoA esters from plant tissues. *Plant J.* **25**, 115–125 <https://doi.org/10.1111/j.1365-313X.2001.00929.x>
- 36 Domergue, F., Abbadi, A., Zähringer, U., Moreau, H. and Heinz, E. (2005) In vivo characterization of the first acyl-CoA  $\Delta 6$ -desaturase from a member of the plant kingdom, the microalga *Ostreococcus tauri*. *Biochem. J.* **389**, 483–490 <https://doi.org/10.1042/BJ20050111>
- 37 Kikukawa, H., Sakuradani, E., Ando, A., Shimizu, S. and Ogawa, J. (2018) Arachidonic acid production by the oleaginous fungus *Mortierella alpina* 1S-4. A review. *J. Adv. Res.* **11**, 15–22 <https://doi.org/10.1016/j.jare.2018.02.003>
- 38 Badami, R. and Patil, K. (1980) Structure and occurrence of unusual fatty acids in minor seed oils. *Prog. Lipid Res.* **19**, 119–153 [https://doi.org/10.1016/0163-7827\(80\)90002-8](https://doi.org/10.1016/0163-7827(80)90002-8)
- 39 Spatafora, J. W., Chang, Y., Benny, G. L., Lazarus, K., Smith, M. E., Berbee, M. L., Bonito, G., Corradi, N., Grigoriev, I. and Gryganskyi, A. et al. (2016) A phylum-level phylogenetic classification of zygomycete fungi based on genome-scale data. *Mycol.* **108**, 1028–1046 <https://doi.org/10.3852/16-042>
- 40 Meesapyodsuk, D. and Qiu, X. (2012) The front-end desaturase: Structure, function, evolution and biotechnological use. *Lipids* **47**, 227–237 <https://doi.org/10.1007/s11745-011-3617-2>
- 41 Stuke, J. E., McDonough, V. M. and Martin, C. E. (1990) The *OLE1* gene of *Saccharomyces cerevisiae* encodes the  $\Delta 9$  fatty acid desaturase and can be functionally replaced by the rat stearoyl-CoA desaturase gene. *J. Biol. Chem.* **265**, 20144–20149
- 42 Tsai, Y.-Y., Ohashi, T., Wu, C.-C., Bataa, D., Misaki, R., Limtong, S. and Fujiyama, K. (2019) Delta-9 fatty acid desaturase overexpression enhanced lipid production and oleic acid content in *Rhodospiridium toruloides* for preferable yeast lipid production. *J. Biosc. Bioeng.* **127**, 430–440 <https://doi.org/10.1016/j.jbiosc.2018.09.005>
- 43 Domergue, F., Abbadi, A. and Heinz, E. (2005) Relief for fish stocks: Oceanic fatty acids in transgenic oilseeds. *Trends Plant Sci.* **10**, 112–116 <https://doi.org/10.1016/j.tplants.2005.01.003>
- 44 Miyazaki, M., Bruggink, S. M. and Ntambi, J. M. (2006) Identification of mouse palmitoyl-coenzyme A  $\Delta 9$ -desaturase. *J. Lipid Res.* **47**, 700–704 <https://doi.org/10.1194/jlr.C500025-JLR200>
- 45 Hong, M., Zilinskas, B. A., Knipple, D. C. and Chin, C.-K. (2004) *cis*-3-Hexenal production in tobacco is stimulated by 16-carbon monounsaturated fatty acids. *Phytochemistry* **65**, 159–168 <https://doi.org/10.1016/j.phytochem.2003.10.013>
- 46 Wang, C., Chin, C.-K. and Gianfagna, T. (2000) Relationship between cutin monomers and tomato resistance to powdery mildew infection. *Physiol. Mol. Plant Pathol.* **57**, 55–61 <https://doi.org/10.1006/pmpp.2000.0279>

- 47 Xing, J. and Chin, C.-K. (2000) Modification of fatty acids in eggplant affects its resistance to *Verticillium dahliae*. *Physiol. Mol. Plant Pathol.* **56**, 217–225  
<https://doi.org/10.1006/pmpp.2000.0268>
- 48 Tugizimana, F., Steenkamp, P. A., Piater, L. A. and Dubery, I. A. (2014) Multi-platform metabolomic analyses of ergosterol-induced dynamic changes in *Nicotiana tabacum* cells. *PLoS One* **9**, e87846 <https://doi.org/10.1371/journal.pone.0087846>
- 49 Rossard, S., Roblin, G. and Atanassova, R. (2010) Ergosterol triggers characteristic elicitation steps in *Beta vulgaris* leaf tissues. *J. Exp. Bot.* **61**, 1807–1816  
<https://doi.org/10.1093/jxb/erq047>
- 50 Yang, J.-O., Nakayama, N., Toda, K., Tebayashi, S. and Kim, C.-S. (2014) Structural determination of elicitors in *Sogatella furcifera* (Horváth) that induce Japonica rice plant varieties (*Oryza sativa* L.) to produce an ovicidal substance against *S. furcifera* eggs. *Biosci. Biotechnol. Biochem.* **78**, 937–942 <https://doi.org/10.1080/09168451.2014.917266>

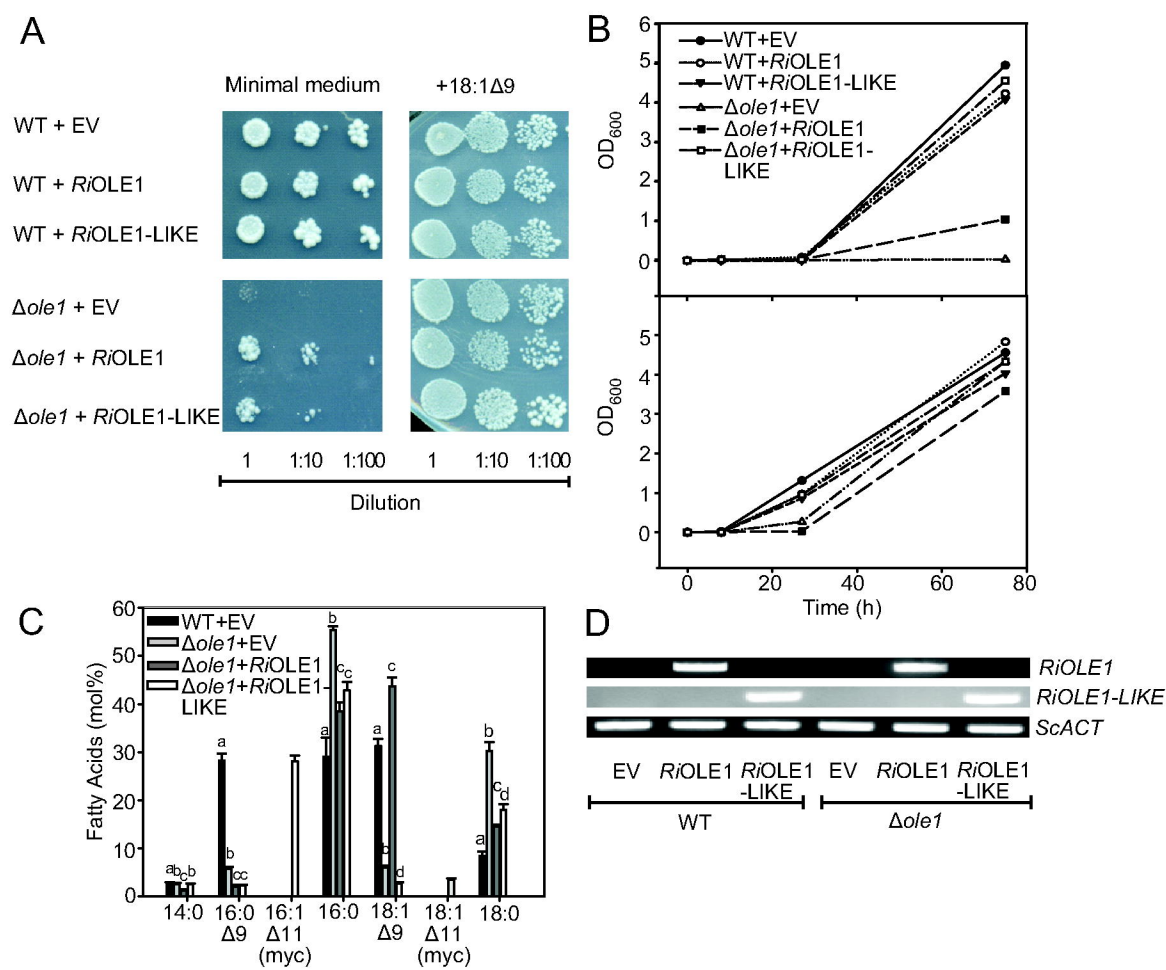

Figure 1

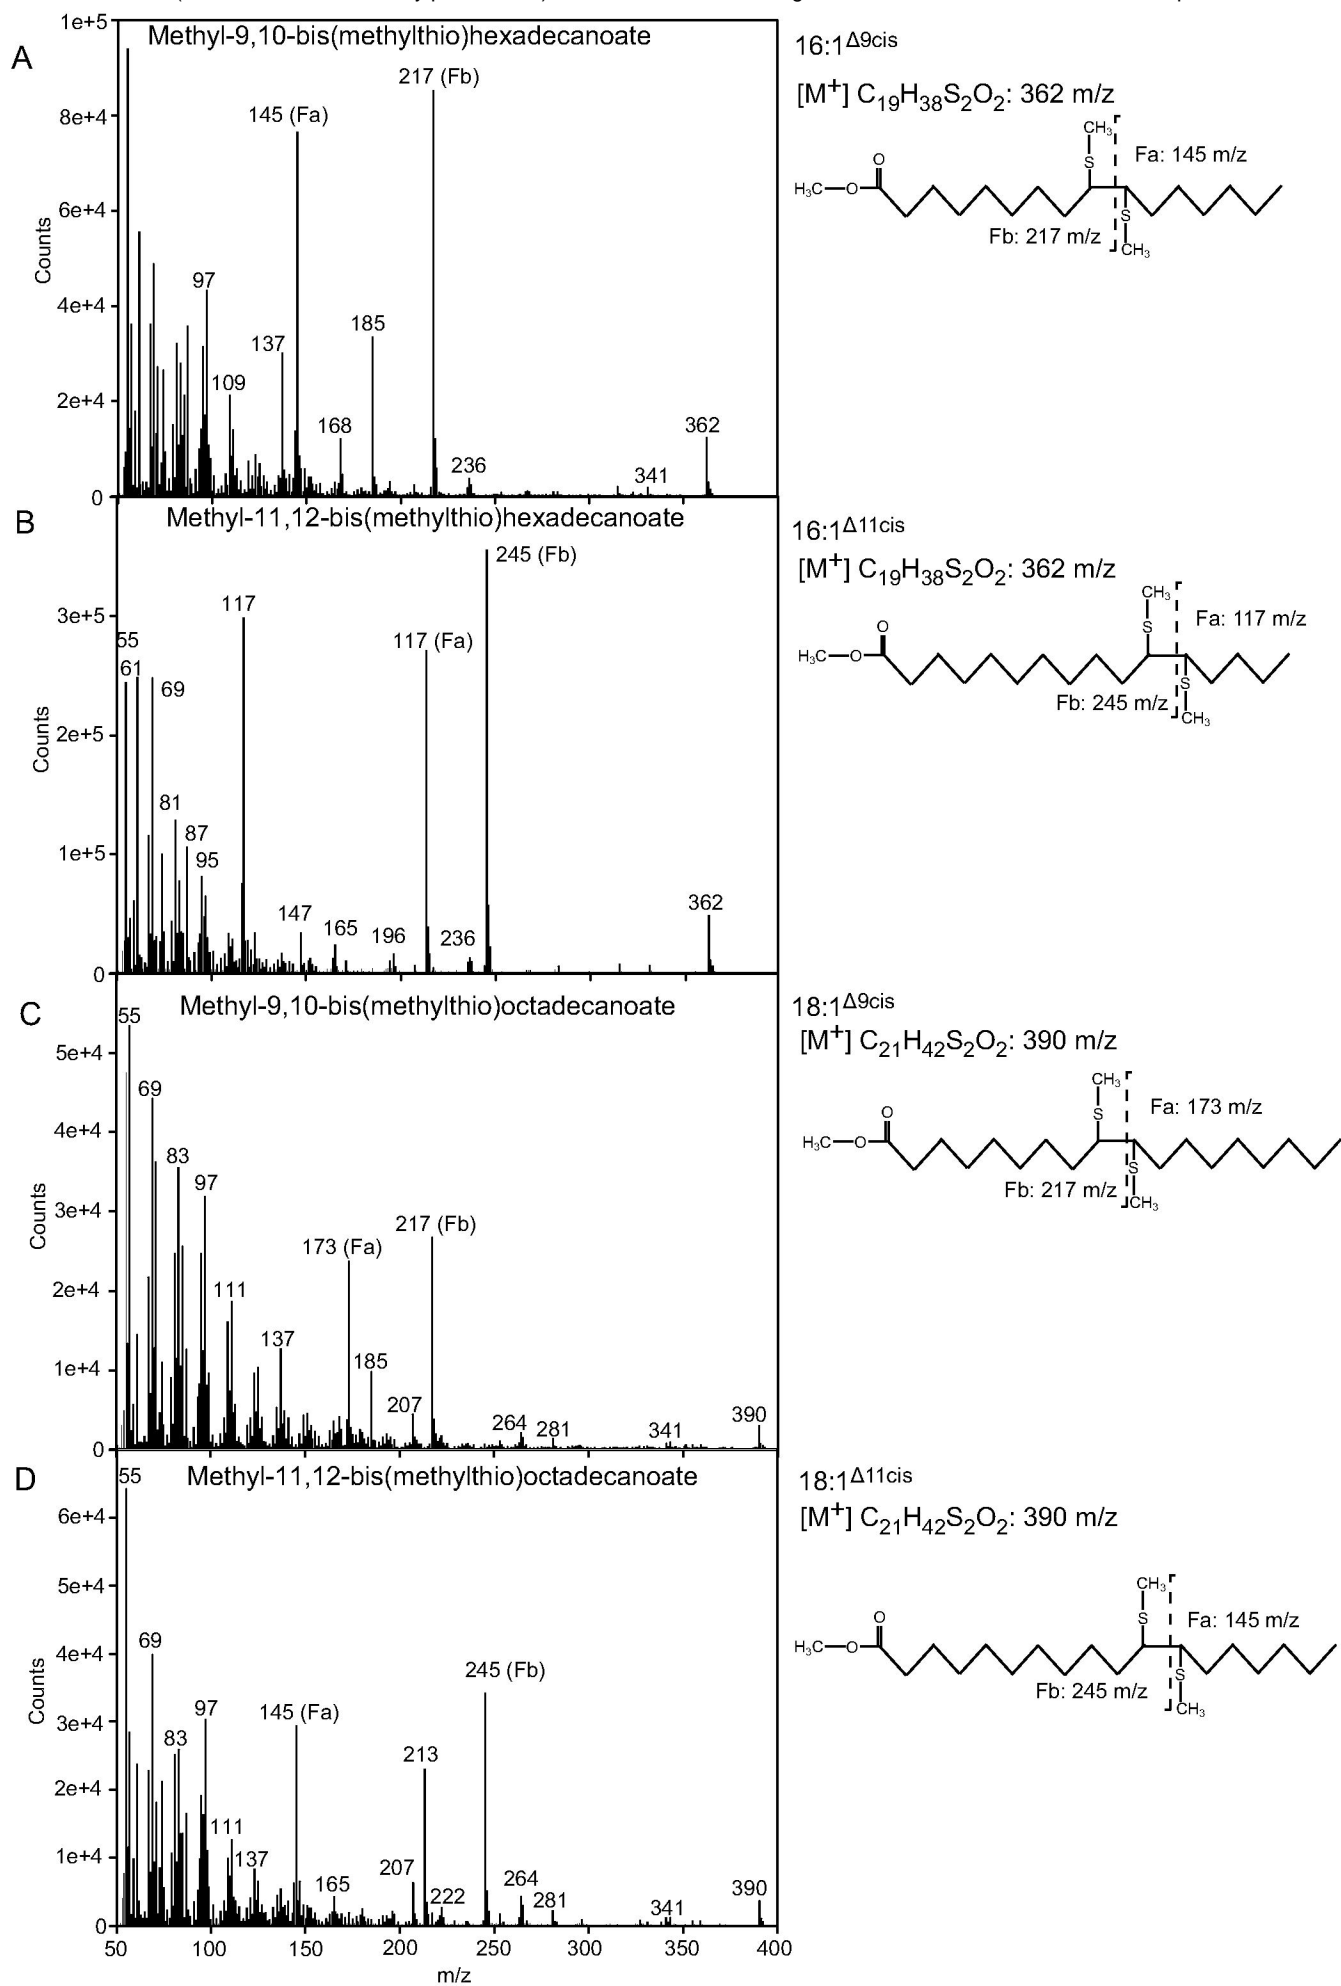

Figure 2

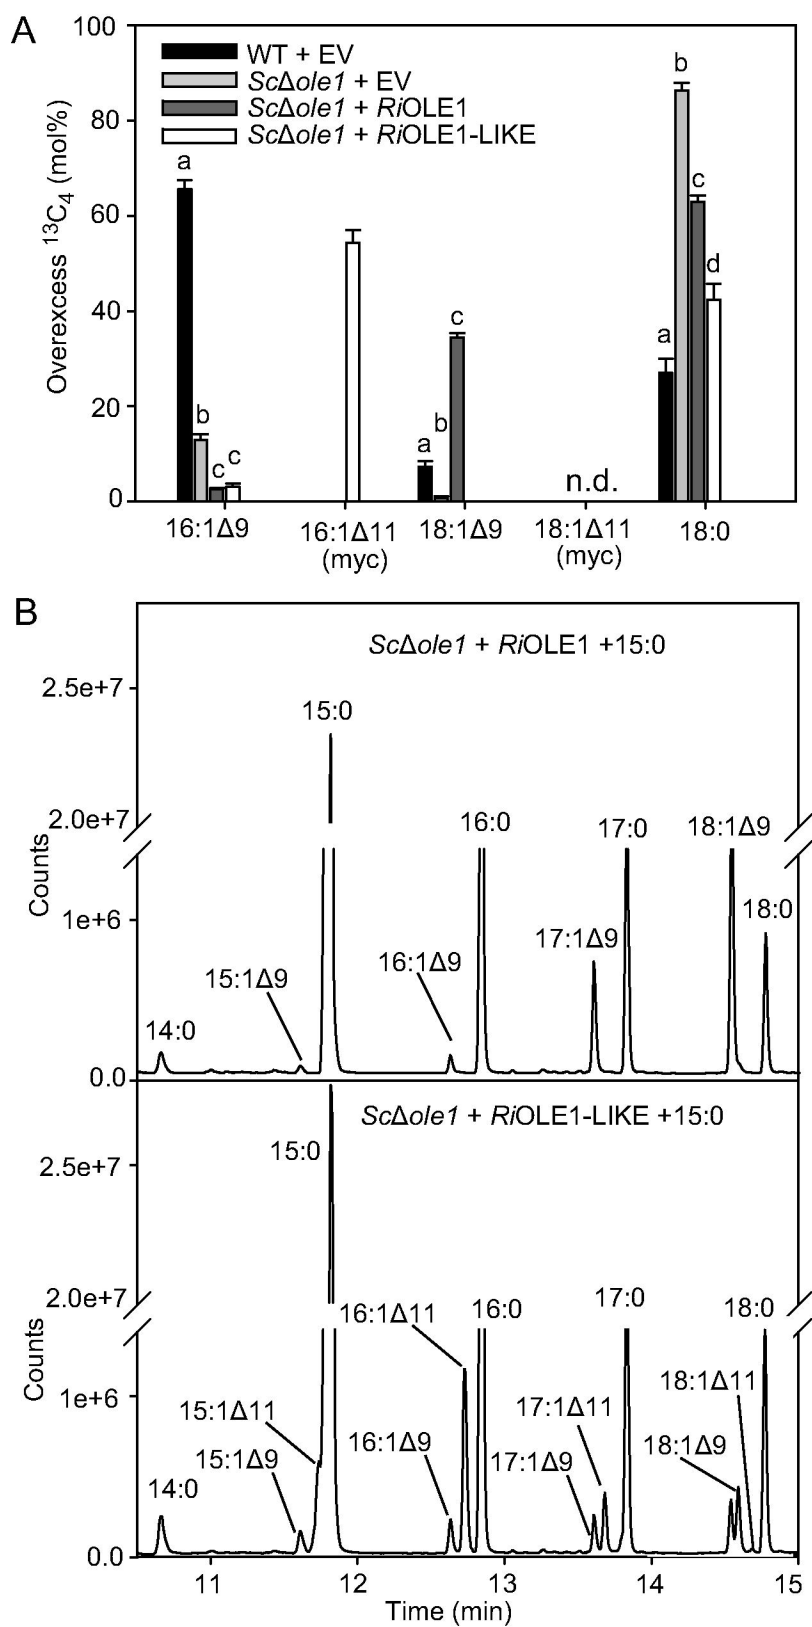

Figure 3

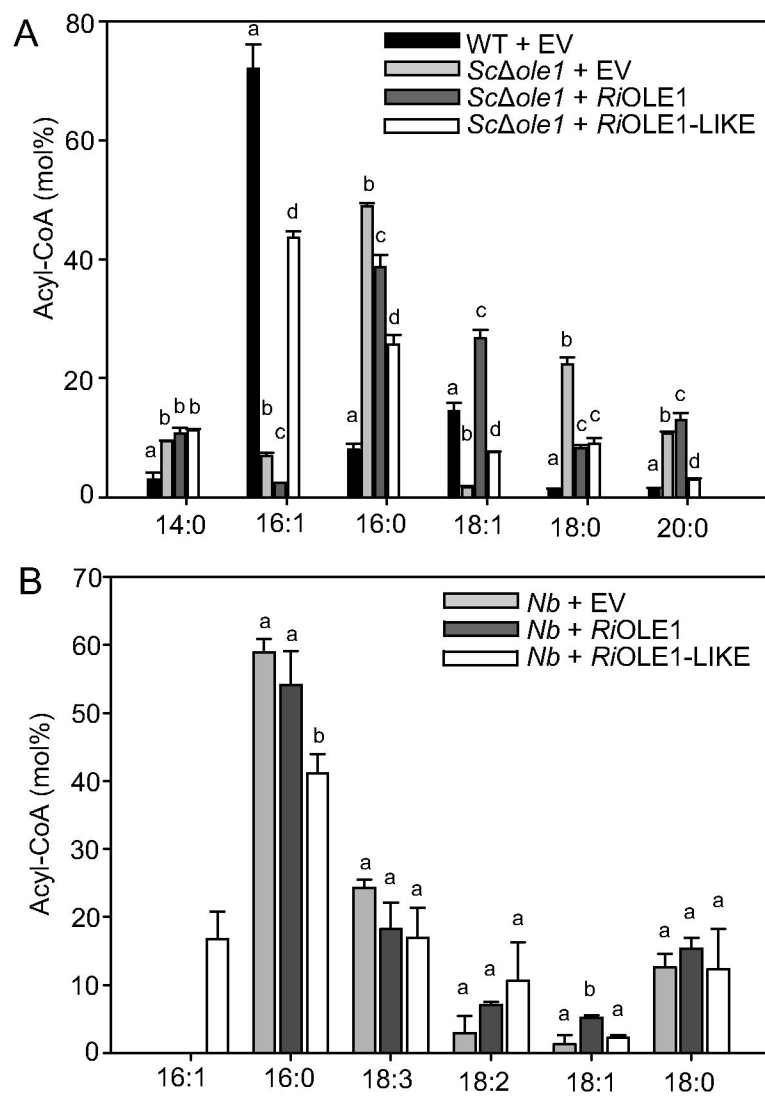

Figure 4

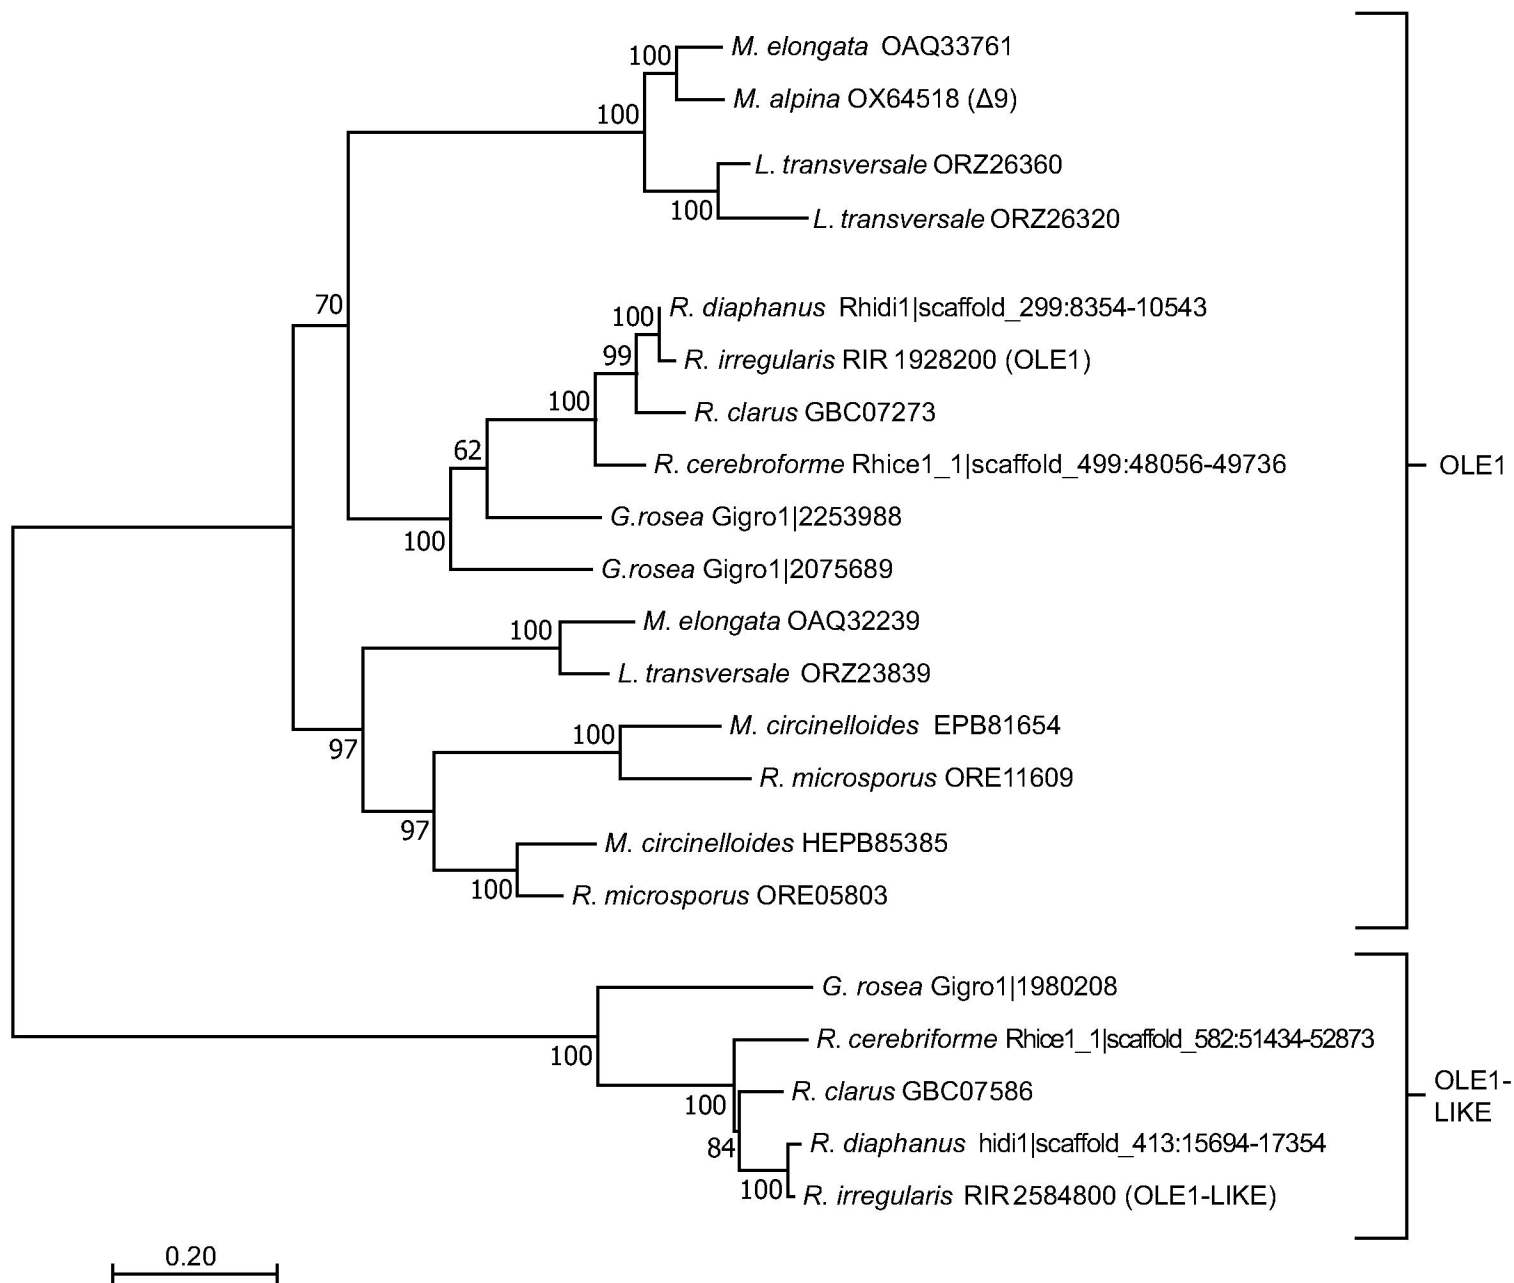

Figure 5
